# Supplementary material
Source: ML conference proceedings conference paper supplement (https://aclanthology.org/2024.semeval-1.111)

# Hyper-parameters Fine-tuning

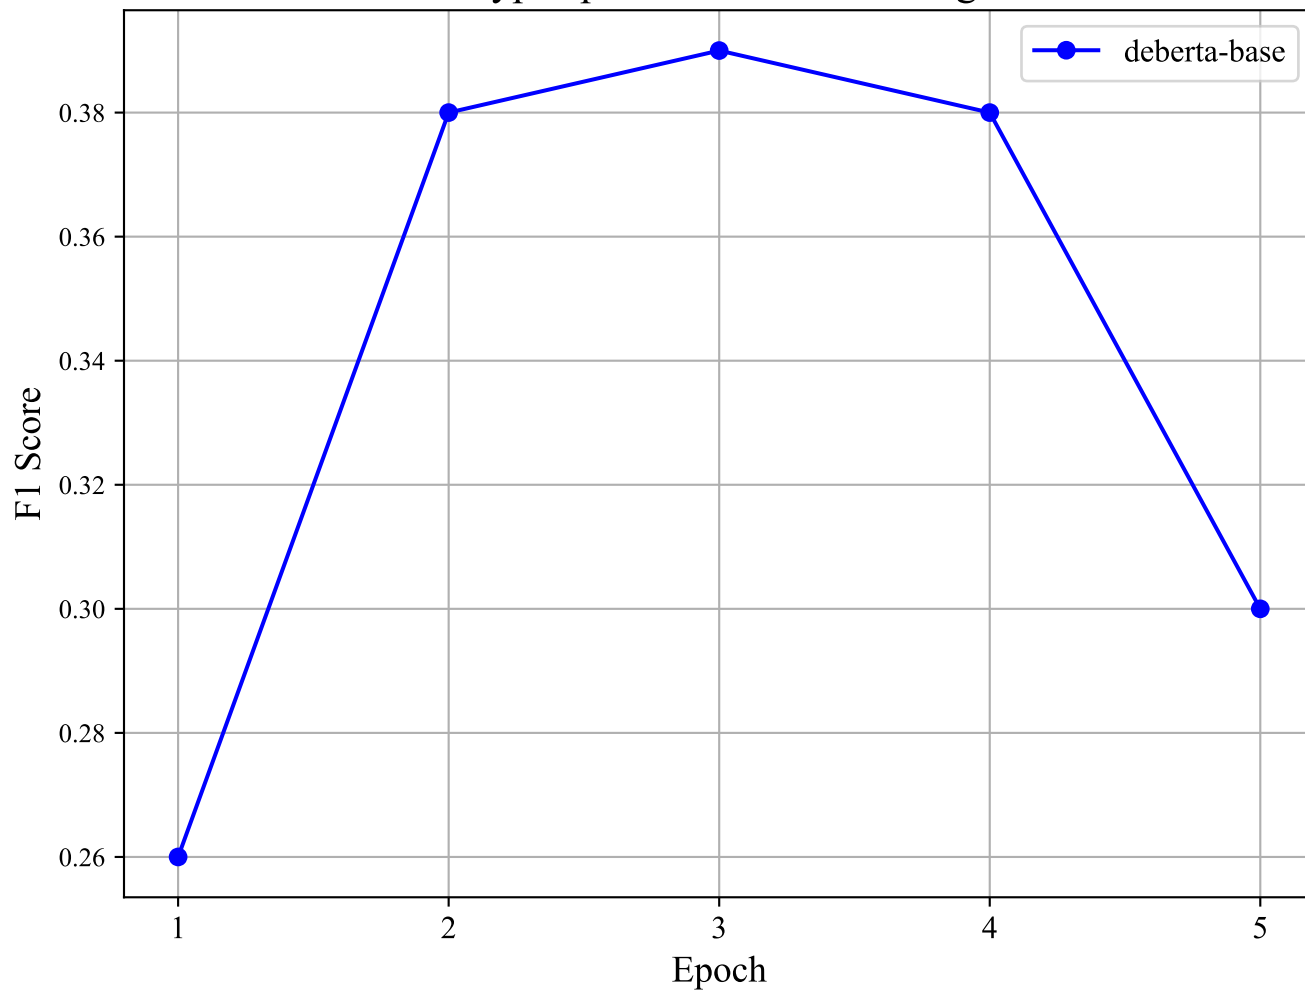

Supplement: SupplementaryMaterial [file 2024.semeval-1.111.SupplementaryMaterial.zip]

# Hyper-parameters Fine-tuning

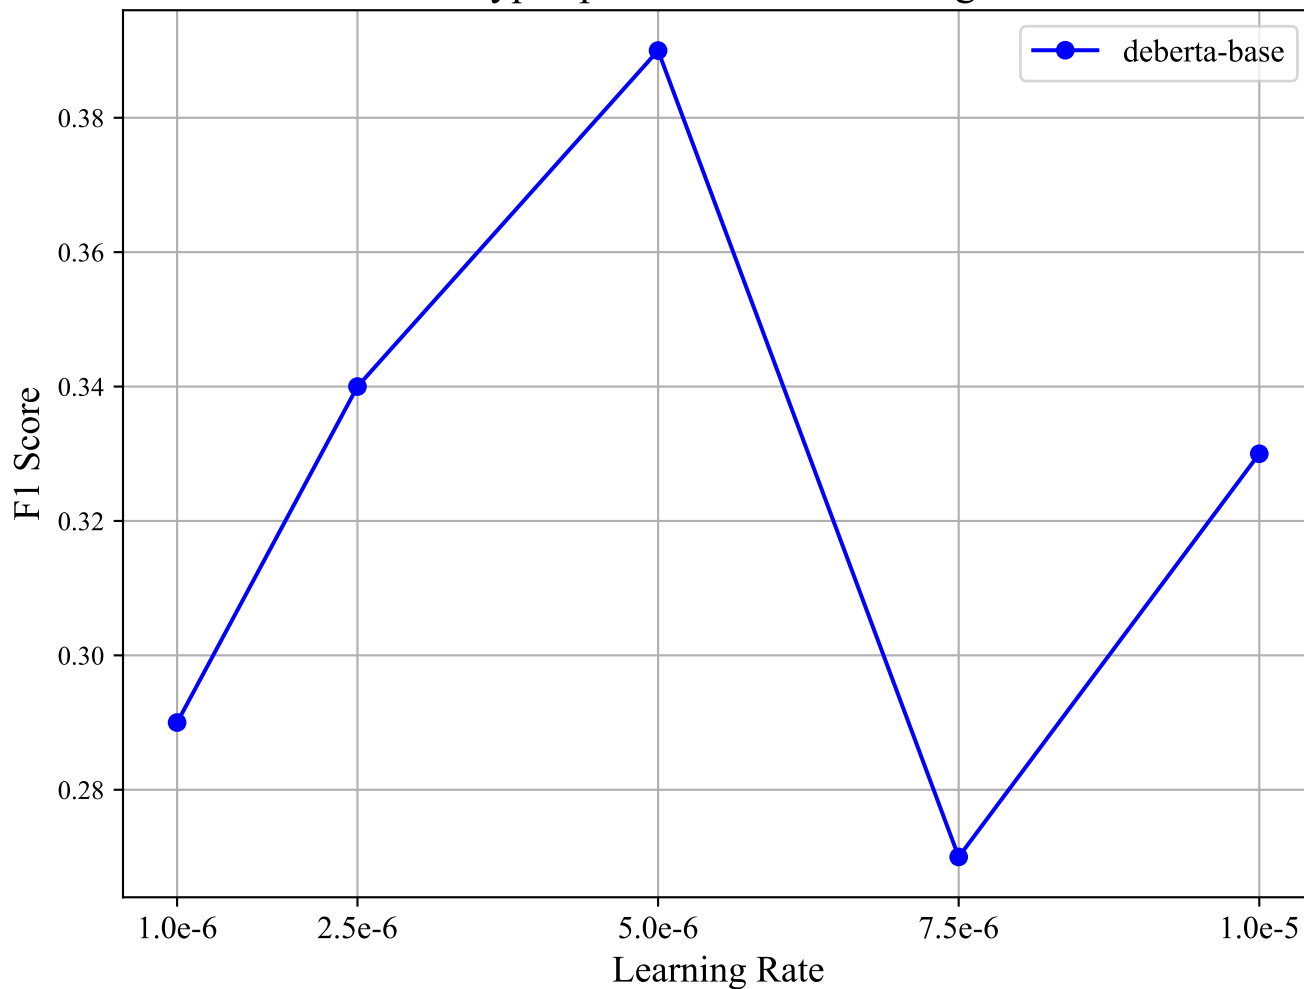

Supplement: SupplementaryMaterial [file 2024.semeval-1.111.SupplementaryMaterial.zip]

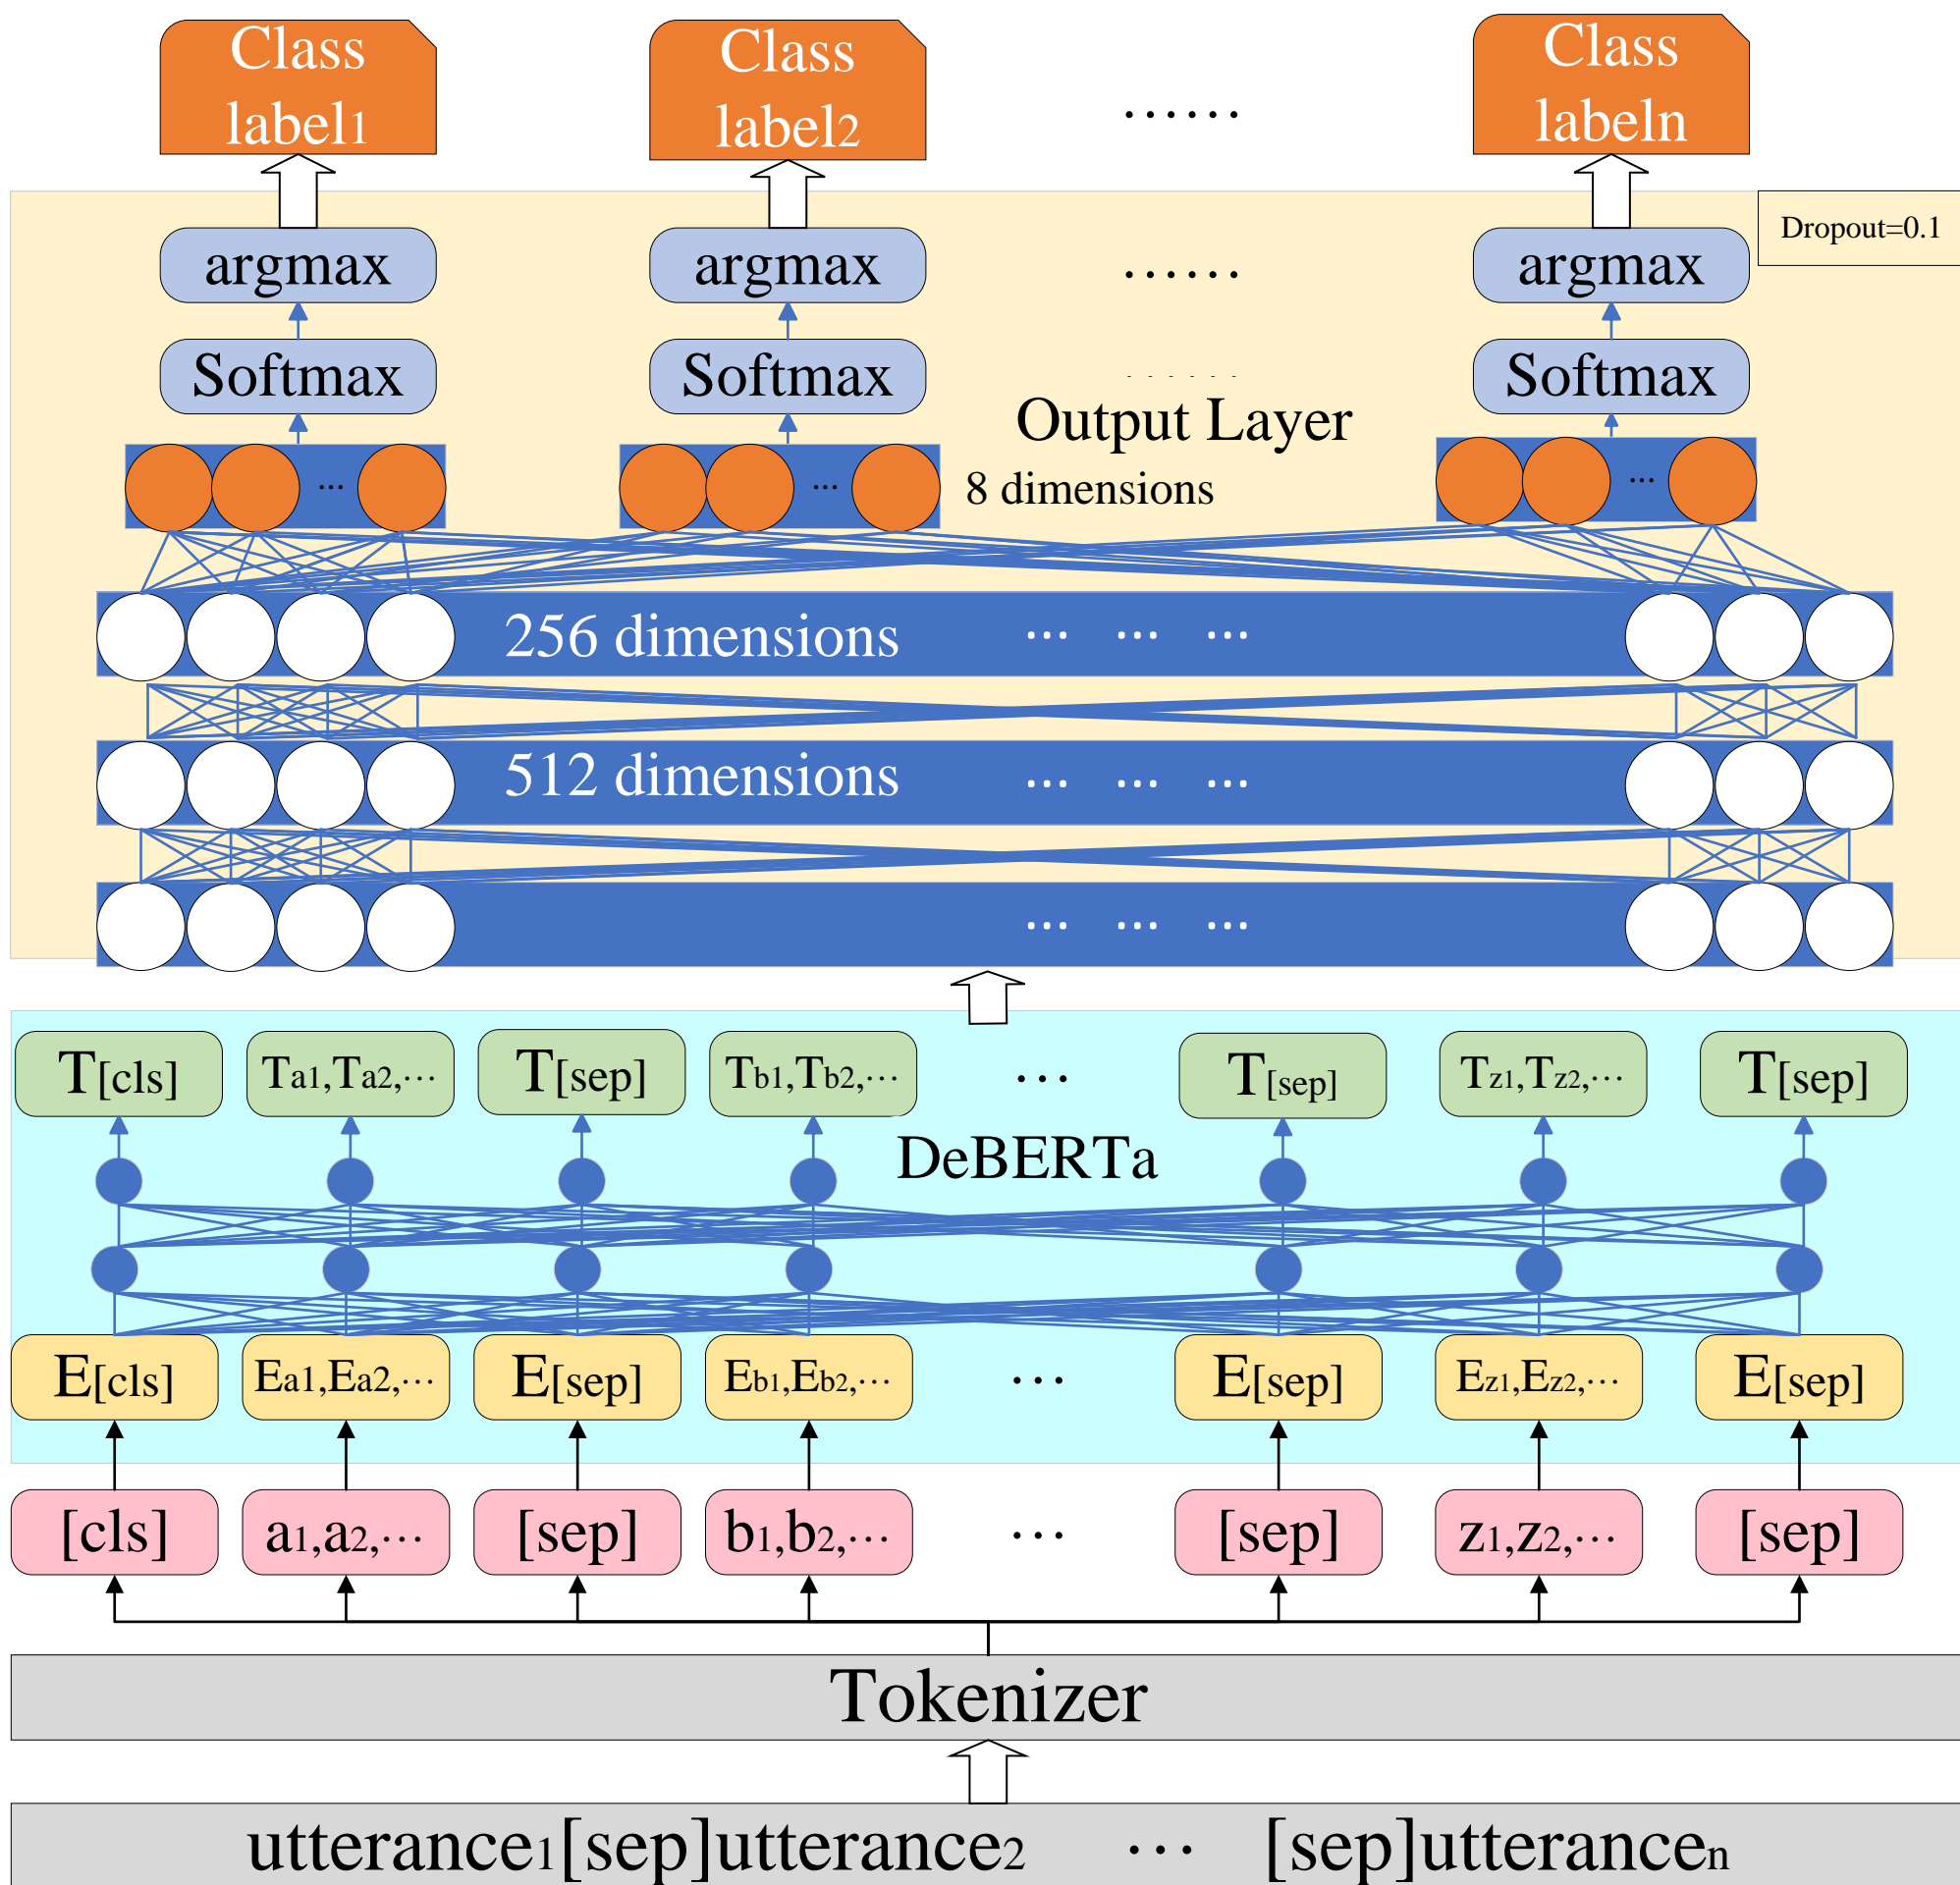

Supplement: SupplementaryMaterial [file 2024.semeval-1.111.SupplementaryMaterial.zip]

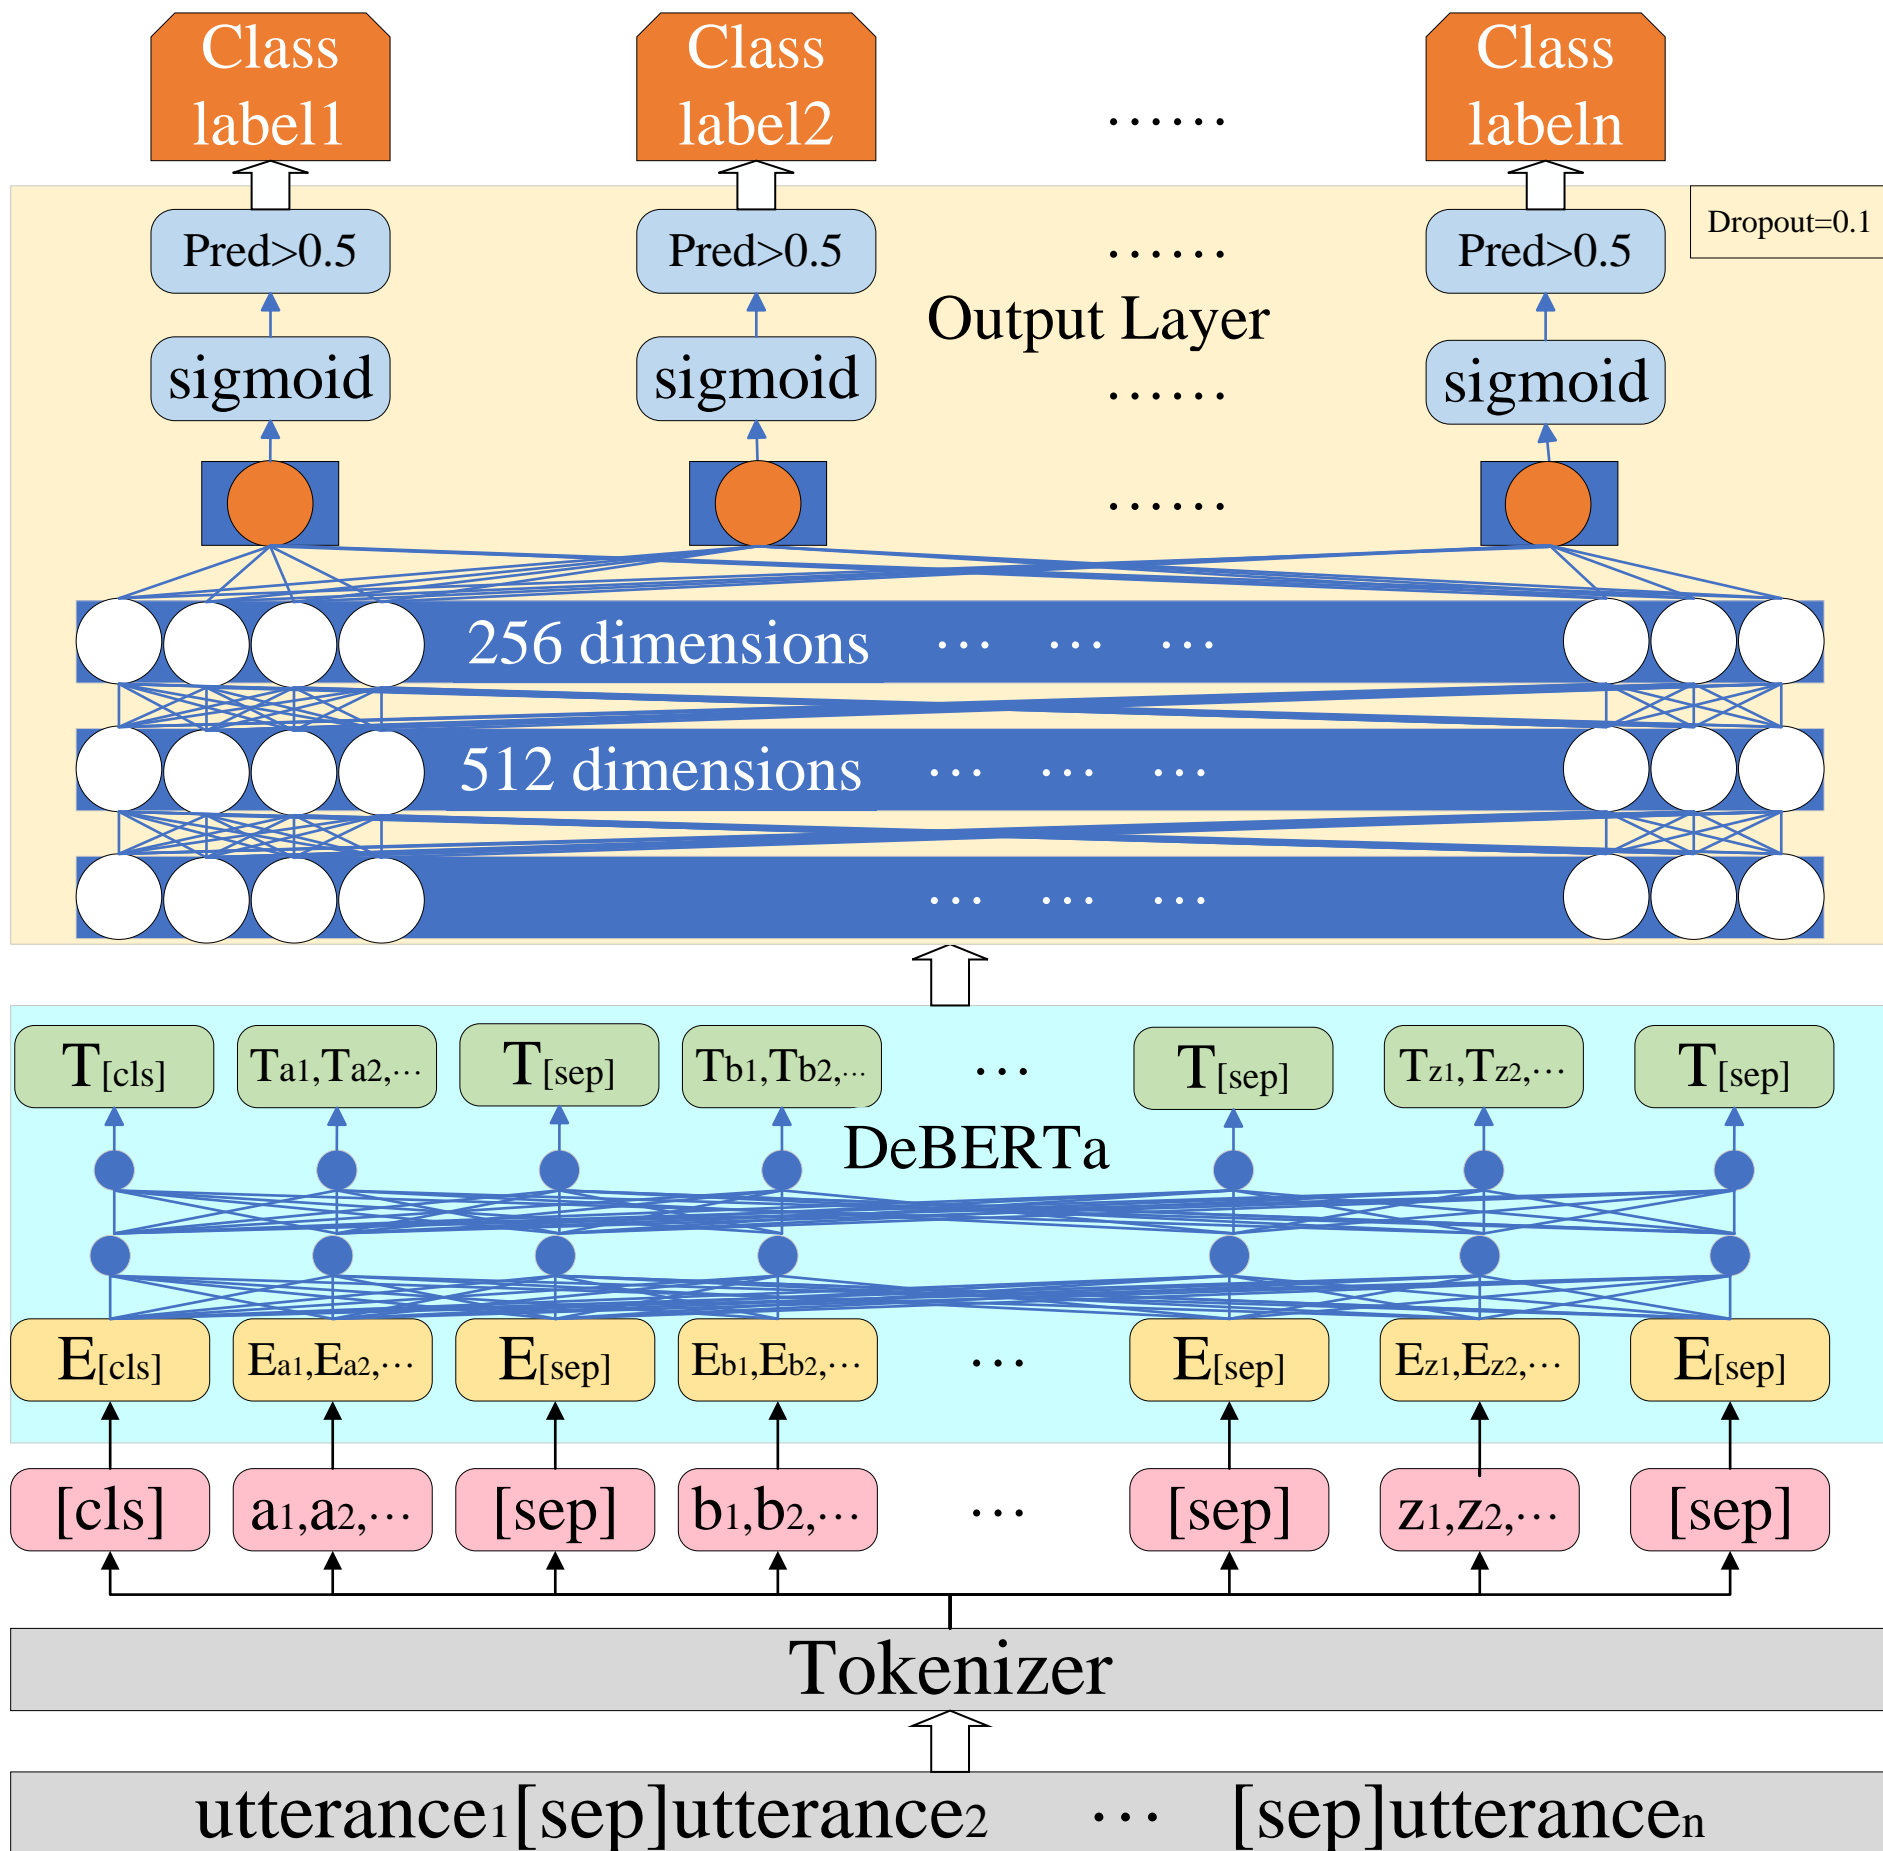

Supplement: SupplementaryMaterial [file 2024.semeval-1.111.SupplementaryMaterial.zip]
